# Supplementary material for: Novel Multidrug-Resistant Cronobacter sakazakii Causing Meningitis in Neonate, China, 2015
Source: PubMed Central journal article supplement (PMC6199977; doi:10.3201/eid2411.180718), 2018-11
Supplement: 18-0718-Techapp-s1.pdf [file 18-0718-Techapp-s1.pdf]

# Novel Multidrug-Resistant *Cronobacter sakazakii* Causing Meningitis in Neonates, China, 2015

## Technical Appendix

**Technical Appendix Table 1.** Antimicrobial drug susceptibility profiles

| Category                  | Antibiotics                   | MIC, mg/L/antimicrobial susceptibility* |
|---------------------------|-------------------------------|-----------------------------------------|
| Penicillin                | Ampicillin                    | ≥32/R                                   |
| Cephalosporin             | Cefazolin                     | ≥64/R                                   |
|                           | Ceftriaxone                   | ≥64/R                                   |
|                           | Ceftazidime                   | 2/S                                     |
|                           | Cefepime                      | ≤1/S                                    |
| Carbapenem                | Imipenem                      | ≤1/S                                    |
|                           | Ertapenem                     | ≤0.5/S                                  |
| Monobactam                | Aztreonam                     | 32/R                                    |
| Aminoglycoside            | Gentamicin                    | ≥16/R                                   |
|                           | Tobramycin                    | 8/I                                     |
| Tetracycline              | Tetracycline                  | ≥16/R                                   |
| Phenicol                  | Chloramphenicol               | ≥32/R                                   |
| Folate pathway Inhibitors | Trimethoprim–sulfamethoxazole | ≥320/R                                  |
| Nitrofurantoin            | Nitrofurantoin                | 64/I                                    |
| Fluoroquinolone           | Ciprofloxacin                 | ≤0.25/S                                 |

\*The results were interpreted using the *Enterobacteriaceae* data from the Clinical and Laboratory Standards Institute (CLSI).

**Technical Appendix Table 2.** Large mobile elements and different types of secretion systems regions (>10 kb), and drug resistance genes identified in *C. sakazakii* strain GZcsf-1

| Location | Type*      | Nucleotide position | G+C%        | Drug resistance             | Resistance     | Nucleotide position |
|----------|------------|---------------------|-------------|-----------------------------|----------------|---------------------|
|          |            |                     |             | marker                      | phenotype      |                     |
| Genome   | ICE-1      | 530004–610181       | 55.0        | <i>sul1</i>                 | Sulfonamide    | 595806–596645       |
|          |            |                     |             | <i>aadA1</i>                | Aminoglycoside | 597150–597941       |
|          | T4SS       | 545665–566157       | 58.0        |                             |                |                     |
|          | prophage-1 | 1033049–1074601     | 55.1        |                             |                |                     |
|          | GI-1       | 1519846–1536984     | 51.1        |                             |                |                     |
|          | ICE-2      | 1642519–1691107     | 47.5        |                             |                |                     |
|          | prophage-2 | 2082823–2120897     | 50.1        |                             |                |                     |
|          | GI-2       | 2299395–2309757     | 54.0        |                             |                |                     |
|          | T6SS-1     | 2483935–2503145     | 56.6        |                             |                |                     |
|          | T6SS-2     | 3176946–3204571     | 51.6        |                             |                |                     |
|          | GI-3       | 3850021–3879063     | 42.7        |                             |                |                     |
|          | T6SS-3     | 4360551–4404179     | 56.6        |                             |                |                     |
|          | pGW1       |                     |             |                             | <i>qnrB4</i>   | Fluoroquinolone     |
|          |            |                     |             | <i>bla<sub>DHA-1</sub></i>  | Beta-lactam    | 12786–13925         |
|          |            |                     |             | <i>sul1</i>                 | Sulfonamide    | 15502–16341         |
|          |            |                     |             | <i>bla<sub>SFO-1</sub></i>  | Beta-lactam    | 26538–27425         |
|          |            |                     |             | <i>mph(A)</i>               | Macrolide      | 42030–42935         |
|          |            |                     |             | <i>sul1</i>                 | Sulfonamide    | 44465–45304         |
|          |            |                     |             | <i>aadA2</i>                | Aminoglycoside | 45809–46600         |
|          |            |                     |             | <i>dfrA12</i>               | Trimethoprim   | 47008–47505         |
|          |            |                     |             | <i>aac(3)-IId</i>           | Aminoglycoside | 50075–50935         |
|          |            |                     |             | <i>bla<sub>TEM-1B</sub></i> | Beta-lactam    | 55907–56767         |
|          |            |                     |             | <i>dfrA18</i>               | Trimethoprim   | 65766–66335         |
|          |            |                     |             | <i>strA</i>                 | Aminoglycoside | 68109–68912         |
|          |            |                     |             | <i>strB</i>                 | Aminoglycoside | 68912–69748         |
|          |            |                     |             | <i>aphA1</i>                | Aminoglycoside | 106293–107108       |
|          |            |                     |             | <i>tet(D)</i>               | Tetracycline   | 173801–174985       |
|          |            |                     |             | <i>catA2</i>                | Phenicol       | 176597–177238       |
|          |            |                     |             | <i>aac(6')-IIc</i>          | Aminoglycoside | 332723–333304       |
|          |            |                     |             | <i>ereA2</i>                | Macrolide      | 337620–338660       |
|          |            |                     | <i>sul1</i> | Sulfonamide                 | 339184–340023  |                     |
| pGW2     | T6SS       | 35992–66569         | 55.3        |                             |                |                     |

\*ICE: Integrative and conjugative elements; GI: Genomic islands.
